# Supplementary material for: Applying an osteopathic intervention to improve mild to moderate mental health symptoms: a mixed-methods feasibility study protocol
Source: HighWire-hosted journal article supplement (doi:10.1136/bmjopen-2023-071680), 2023-06-01
Supplement: bmjopen-2023-071680supp002_data_supplement.pdf [file bmjopen-2023-071680supp002_data_supplement.pdf]

Supplemental material 1.  
Adverse events report form

|                                                          |             |
|----------------------------------------------------------|-------------|
| Adverse Events Report Form                               |             |
| Practitioner ID:                                         | Patient ID: |
| Date:                                                    | Location:   |
| Description of adverse event:                            |             |
| Actions taken:<br>What?<br>When?<br>By whom?<br>Outcome? |             |
| Further actions needed?                                  |             |
